# Supplementary material
Source: Research Square preprint supplement (doi:10.21203/rs.3.rs-9366044/v1)
Supplement: Supplementary file 1 [file 559e8e8b52c18b592ae97325.docx]

Table S1. Information of oxylipins analyzed in this study

| **Compound** | **formal_name** | **Pubchem ID** | **PUFA precuror** | **metabolic pathway** |
| --- | --- | --- | --- | --- |
| 9-HOTrE | 9S-hydroxy-10E,12Z,15Z-octadecatrienoic acid | 47205634 | ALA | LOX |
| 13-HOTrE | 13S-hydroxy-9Z,11E,15Z-octadecatrienoic acid | 16061072 | ALA | LOX |
| 15-oxoETE | 15-oxo-5Z,8Z,11Z,13E-eicosatetraenoic acid | 5280701 | ARA | LOX |
| 12-oxoETE | 12-oxo-5Z,8Z,10E,14Z-eicosatetraenoic acid | 5283162 | ARA | LOX |
| 5-oxoETE | 5-oxo-6E,8Z,11Z,14Z-eicosatetraenoic acid | 5283159 | ARA | LOX |
| 12-HETE | (±)12-hydroxy-5Z,8Z,10E,14Z-eicosatetraenoic acid | 5283155 | ARA | LOX |
| 5-HETE | (±)5-hydroxy-6E,8Z,11Z,14Z-eicosatetraenoic acid | 5280733 | ARA | LOX |
| 15-HETE | (±)15-hydroxy-5Z,8Z,11Z,13E-eicosatetraenoic acid | 5280724 | ARA | LOX |
| LTB4 | 5S,12R-dihydroxy-6Z,8E,10E,14Z-eicosatetraenoic acid | 5280492 | ARA | LOX |
| 8,15-diHETE | 8S,15S-dihydroxy-5Z,9E,11Z,13E-eicosatetraenoic acid | 53480358 | ARA | LOX |
| LXA4 | 5S,6R,15S-Trihydroxy-7E,9E,11Z,13E-eicosatetraenoic acid | 5280914 | ARA | LOX |
| 6-trans-LTB4 | 6-trans leukotriene B4 | 5283128 | ARA | LOX |
| 15-HETrE | 15S-hydroxy-8Z,11Z,13E-eicosatrienoic acid | 5283145 | DGLA | LOX |
| PGA1 | 9-oxo-15S-hydroxy-prosta-10,13E-dien-1-oic acid | 5281912 | DGLA | LOX |
| Protectin D1 | 10R,17S-dihydroxy-4Z,7Z,11E,13E,15Z,19Z-docosahexaenoic acid | 16042541 | DHA | LOX |
| RvD2 | 7S,16R,17S-trihydroxy-4Z,8E,10Z,12E,14E,19Z-docosahexaenoic acid | 16061136 | DHA | LOX |
| 14s-HDoHE | (±)14-hydroxy-4Z,7Z,10Z,12E,16Z,19Z-docosahexaenoic acid | 11566378 | DHA | LOX |
| RvD1 | 7S,8,17S-trihydroxy-docosa-4Z,9E,11E,13Z,15E,19Z-hexaenoic acid | 16061135 | DHA | LOX |
| RvD5 | resolvin D1 | 16061139 | DHA | LOX |
| 7-HDHA | (±)7-hydroxy-4Z,8E,10Z,13Z,16Z,19Z-docosahexaenoic acid | 53394256 | DHA | LOX |
| 4-HDHA | (±)4-hydroxy-5E,7Z,10Z,13Z,16Z,19Z-docosahexaenoic acid | 53394255 | DHA | LOX |
| 12-HEPE | (±)-12-hydroxy-5Z,8Z,10E,14Z,17Z-eicosapentaenoic acid | 10041593 | EPA | LOX |
| 5-HEPE | (±)-5-hydroxy-6E,8Z,11Z,14Z,17Z-eicosapentaenoic acid | 6439678 | EPA | LOX |
| 15-HEPE | (±)-15-hydroxy-5Z,8Z,11Z,13E,17Z-eicosapentaenoic acid | 53480357 | EPA | LOX |
| 5-HETrE | 5S-hydroxy-6E,8Z,11Z-eicosatrienoic acid | 5283143 | GLA | LOX |
| 9,12,13-TriHOME | 9S,12S,13S-trihydroxy-10E-octadecenoic acid | 9858729 | LA | LOX |
| 13-oxo-ODE | 13-oxo-9Z,11E-octadecadienoic acid | 6446027 | LA | LOX |
| 14, 15-EET | (±)14(15)-epoxy-5Z,8Z,11Z-eicosatrienoic acid | 5283205 | ARA | CYP450 |
| 5,6-EET | (±)5,6-epoxy-8Z,11Z,14Z-eicosatrienoic acid | 5283202 | ARA | CYP450 |
| 9-HETE | (±)-9-hydroxy-5Z,7E,11Z,14Z-eicosatetraenoic acid | 5312978 | ARA | CYP450 |
| 8,9-EET | (±)8,9-epoxy-5Z,11Z,14Z-eicosatrienoic acid | 5283203 | ARA | CYP450 |
| 11,12-EET | (±)11,(12)-epoxy-5Z,8Z,14Z-eicosatrienoic acid | 40490664 | ARA | CYP450 |
| 5,6-diHETrE | (±)5,6-dihydroxy-8Z,11Z,14Z-eicosatrienoic acid | 5283142 | ARA | CYP450 |
| 14,15-DiHET | 14,15-dihydroxy-5Z,8Z,11Z-eicosatrienoic acid | 5283147 | ARA | CYP450 |
| 11,12-DiHET | (±)11,12-dihydroxy-5Z,8Z,14Z-eicosatrienoic acid | 11759555 | ARA | CYP450 |
| 8,9-DiHET | (±)8,9-dihydroxy-5Z,11Z,14Z-eicosatrienoic acid | 3246873 | ARA | CYP450 |
| 19-HETE | 19-hydroxyeicosatetraenoic acid | 20839325 | ARA | CYP450 |
| 20-HETE | 20-hydroxy-5Z,8Z,11Z,14Z-eicosatetraenoic acid | 5283157 | ARA | CYP450 |
| 14(15)-EET | (±)14,15-epoxy-5Z,8Z,11Z-eicosatrienoic acid | 1431 | ARA | CYP450 |
| 19(20)-EpDPE | (±)19,20-epoxy-4Z,7Z,10Z,13Z,16Z-docosapentaenoic acid | 11631565 | DHA | CYP450 |
| 16(17)-EpDPE | (±)16,17-epoxy-4Z,7Z,10Z,13Z,19Z-docosapentaenoic acid | 14392758 | DHA | CYP450 |
| 19,20-DiHDPA | (±)19,20-dihydroxy-4Z,7Z,10Z,13Z,16Z-docosapentaenoic acid | 16061148 | DHA | CYP450 |
| 16,17-DiHDPA | (4z,7z,10z,13z,16r,17r,19z)-16,17-Dihydroxydocosa-4,7,10,13,19-Pentaenoic Acid | 129364499 | DHA | CYP450 |
| 13,14-DiHDPA | 13,14-dihydroxy-4Z,7Z,10Z,16Z,19Z-docosapentaenoic acid | 129364495 | DHA | CYP450 |
| 10,11-DiHDPA | (±)10,11-dihydroxy-4Z,7Z,13Z,16Z,19Z-docosapentaenoic acid | 129364491 | DHA | CYP450 |
| 7,8-DiHDPA | (±)7,8-dihydroxydocosa-4Z,10Z,13Z,16Z,19Z-pentaenoic acid | 16061144 | DHA | CYP450 |
| 22-HDHA | 22-hydroxy-4Z,7Z,10Z,13Z,16Z,19Z-docosahexaenoic acid | 72715842 | DHA | CYP450 |
| 10(11)-EpDPA | (±)-(4Z,7Z)-9-[3-(2Z,5Z,8Z)-2,5,8-undecatrien-1-yl-2-oxiranyl]-4,7-nonadienoic acid | 124403576 | DHA | CYP450 |
| 7(8)-EpDPA | (±)-(4Z)-6-[3-(2Z,5Z,8Z,11Z)-2,5,8,11-tetradecatetraen-1-yl-2-oxiranyl]-4-hexenoic acid | 89861878 | DHA | CYP450 |
| 13(14)-EpDPA | (±)-(4Z,7Z,10Z)-12-[3-(2Z,5Z)-2,5-octadien-1-yl-2-oxiranyl]-4,7,10-dodecatrienoic acid | 124407158 | DHA | CYP450 |
| 14(15)-EpETE | (±)14,15-epoxy-5Z,8Z,11Z,17Z-eicosatetraenoic acid | 16061088 | EPA | CYP450 |
| 5,6-diHETE | (±)5,6-dihydroxy-8Z,11Z,14Z,17Z-eicosatetraenoic acid | 14429105 | EPA | CYP450 |
| RvE1 | 5S,12R,18R-trihydroxy-6Z,8E,10E,14Z,16E-eicosapentaenoic acid | 25063347 | EPA | CYP450 |
| 17,18-DiHETE | (±)17,18-dihydroxyeicosatetraenoic acid | 16061120 | EPA | CYP450 |
| 14,15-DiHETE | (±)14,15-dihydroxyeicosatetraenoic acid | 16061119 | EPA | CYP450 |
| 11,12-DiHETE | (+/-)-11,12-dihydroxy-5Z,8Z,14Z,17Z-eicosatetraenoic acid | 16061121 | EPA | CYP450 |
| 8,9-DiHETE | (+/-)-8,9-dihydroxy-5Z,11Z,14Z,17Z-eicosatetraenoic acid | 16061118 | EPA | CYP450 |
| 20-HEPE | 20-hydroxy-5Z,8Z,11Z,14Z,17Z-eicosapentaenoic acid | 72551579 | EPA | CYP450 |
| 11(12)-EpETE | (±)11,12-epoxy-5Z,8Z,14Z,17Z- eicosatetraenoic acid | 16061087 | EPA | CYP450 |
| 8(9)-EpETE | (±)8,9-epoxy-5Z,11Z,14Z,17Z-eicosatetraenoic acid | 53394044 | EPA | CYP450 |
| 17(18)-EpETE | (±)17,18-epoxy-5Z,8Z,11Z,14Z-eicosatetraenoic acid | 27076755 | EPA | CYP450 |
| 12,13-EpOME | (±)12(13)epoxy-9Z-octadecenoic acid | 5356421 | LA | CYP450 |
| 9,10-EpOME | (±)9,10-epoxy-12Z-octadecenoic acid | 6246154 | LA | CYP450 |
| 12,13-diHOME | 12,13-dihydroxy-9Z-octadecenoic acid | 10236635 | LA | CYP450 |
| 9,10-diHOME | (±)9,10-dihydroxy-12Z-octadecenoic acid | 25320862 | LA | CYP450 |
| 15d-PGJ2 | 15-deoxy-delta12,14-prostaglandin J2 | 5311211 | ARA | COX |
| 15d-PGA2 | 15-deoxy-Δ12,14-Prostaglandin A2 | 16061104 | ARA | COX |
| 11-HETE | (±)11-hydroxy-5Z,8Z,12E,14Z-eicosatetraenoic acid | 14123410 | ARA | COX |
| PGEM | 9,15-dioxo-11α-hydroxy-13,14-dihydro-2,3,4,5-tetranor-prostan-1,20-dioic acid | 161468 | ARA | COX |
| PGFM | 13,14-dihydro-15-keto Prostaglandin F2α | 5283039 | ARA | COX |
| PGA2 | 9-oxo-15S-hydroxy-prosta-5Z,10,13E-trien-1-oic acid | 5280880 | ARA | COX |
| PGJ2 | 11-oxo-15S-hydroxy-prosta-5Z,9,13E-trien-1-oic acid | 5280884 | ARA | COX |
| 15d-PGD2 | 15-deoxy-Δ12,14-Prostaglandin D2 | 5283052 | ARA | COX |
| PGE2 | 9-oxo-11α,15S-dihydroxy-prosta-5Z,13E-dien-1-oic acid | 5280360 | ARA | COX |
| PGD2 | 9α,15S-dihydroxy-11-oxo-prosta-5Z,13E-dien-1-oic acid | 448457 | ARA | COX |
| dhk PGD2 | 13,14-Dihydro-15-keto-PGD2 | 5283036 | ARA | COX |
| PGF2a | 9α,11α,15S-trihydroxy-prosta-5Z,13E-dien-1-oic acid | 5280363 | ARA | COX |
| 11b PGF2a | 9α,11β,15S-trihydroxy-prosta-5Z,13E-dien-1-oic acid | 5280886 | ARA | COX |
| TXB2 | 9α,11,15S-trihydroxythromba-5Z,13E-dien-1-oic acid | 5283137 | ARA | COX |
| PGI2 | 6,9α-epoxy-11α,15S-dihydroxy-prosta-5Z,13E-dien-1-oic acid | 5282411 | ARA | COX |
| 6-keto-PGF1a | 6-oxo-9α,11α,15S-trihydroxy-prost-13E-en-1-oic acid | 5280888 | ARA | COX |
| PGB2 | 9-oxo-15S-hydroxy-prosta-5Z,8(12),13E-trien-1-oic acid | 5280881 | ARA | COX |
| 20-OH-PGF2a | 20-hydroxy prostaglandin F2α | 472956246 | ARA | COX |
| 20-OH-PGE2 | 20-hydroxy prostaglandin E2 | 5283034 | ARA | COX |
| 2,3-dinor-TXB2 | 2,3-dinor thromboxane B2 | 5283138 | ARA | COX |
| 11-dehydro TXB2 | 11-dehydro thromboxane B2 | 5280891 | ARA | COX |
| 13,14-dihydro-15-keto PGE2 | 13,14-dihydro-15-keto prostaglandin E2 | 5280711 | ARA | COX |
| 13,14-dihydro-15-keto PGD2 | 13,14-dihydro-15-keto prostaglandin D2 | 5283036 | ARA | COX |
| PGK1 | 9,11-dioxo-15S-hydroxy-prost-13E-en-1-oic acid | 16061102 | DGLA | COX |
| PGE1 | 9-oxo-11α,15S-dihydroxy-prost-13E-en-1-oic acid | 5280723 | DGLA | COX |
| PGD1 | 9α,15S-dihydroxy-11-oxo-prost-13E-en-1-oic acid | 5280936 | DGLA | COX |
| PGF1a | 9α,11α,15S-trihydroxy-prost-13E-en-1-oic acid | 5280939 | DGLA | COX |
| 17-HDoHE | (±)17-hydroxy-4Z,7Z,10Z,13Z,15E,19Z-docosahexaenoic acid | 6439179 | DHA | COX |
| PGD3 | 9α,15S-dihydroxy-11-oxo-prosta-5Z,13E,17Z-trien-1-oic acid | 5282260 | EPA | COX |
| PGE3 | 9-oxo-11α,15S-dihydroxy-prosta-5Z,13E,17Z-trien-1-oic acid | 5280937 | EPA | COX |
| delta 17-6-keto-PGF1a | Δ17-6-keto prostaglandin F1α | 472956090 | EPA | COX |
| 9-HODE | (±)-9-hydroxy-10E,12Z-octadecadienoic acid | 5282944 | LA | COX |
| 13-HODE | (±)-13-hydroxy-9Z,11E-octadecadienoic acid | 5282947 | LA | COX |
| 9-oxo-ODE | 9-oxo-10E,12Z-octadecadienoic acid | 9839084 | LA | COX |
| ALA | 9Z,12Z,15Z-octadecatrienoic acid | 5280934 | ALA | PUFA |
| ARA | Arachidonic acid | 444899 | ARA | PUFA |
| Adrenic acid | 7Z,10Z,13Z,16Z-docosatetraenoic acid | 5497181 | ARA | PUFA |
| DGLA | 8Z,11Z,14Z-eicosatrienoic acid | 5280581 | DGLA | PUFA |
| DHA | 4Z,7Z,10Z,13Z,16Z,19Z-docosahexaenoic acid | 445580 | DHA | PUFA |
| EPA | Eicosapentaenoic acid | 446284 | EPA | PUFA |
| GLA | 6Z,9Z,12Z-octadecatrienoic acid | 5280933 | GLA | PUFA |
| LA | 9Z,12Z-octadecadienoic acid | 5280450 | LA | PUFA |
| 10-Nitrooleate | 10-nitro-9E-octadecenoic acid | 24836820 | PUFA | PUFA |
| 9-Nitrooleate | 9-nitro-9E-octadecenoic acid | 11645581 | PUFA | PUFA |
| 13-HDoHE | (±)13-hydroxy-4Z,7Z,10Z,14E,16Z,19Z-docosahexaenoic acid | 11559259 | DHA | non-enzymatic |
| 20-HDHA | (±)20-hydroxy-4Z,7Z,10Z,13Z,16Z,18E-docosahexaenoic acid | 16061143 | DHA | non-enzymatic |
| 16-HDHA | (±)16-hydroxy-4Z,7Z,10Z,13Z,17E,19Z-docosahexaenoic acid | 53394262 | DHA | non-enzymatic |
| 10-HDHA | (±)10-hydroxy-4Z,7Z,11E,13Z,16Z,19Z-docosahexaenoic acid | 53394258 | DHA | non-enzymatic |
| 11-HDHA | (±)11-hydroxy-4Z,7Z,9E,13Z,16Z,19Z-docosahexaenoic acid | 11631564 | DHA | non-enzymatic |
| 8-HDHA | (±)8-hydroxy-4Z,6E,10Z,13Z,16Z,19Z-docosahexaenoic acid | 53394257 | DHA | non-enzymatic |
| 8-HEPE | (±)-8-hydroxy-5Z,9E,11Z,14Z,17Z-eicosapentaenoic acid | 16061128 | EPA | non-enzymatic |
| 18-HEPE | (±)-18-hydroxy-5Z,8Z,11Z,14Z,16E-eicosapentaenoic acid | 16061132 | EPA | non-enzymatic |
| 11-HEPE | (±)-11-hydroxy-5Z,8Z,12E,14Z,17Z-eicosapentaenoic acid | 16061130 | EPA | non-enzymatic |
| 9-HEPE | (±)-9-hydroxy-5Z,7E,11Z,14Z,17Z-eicosapentaenoic acid | 16061129 | EPA | non-enzymatic |
| EKODE | 9-oxo-11-(3-pentyl-2-oxiranyl)-10E-undecenoic acid | 5283007 | LA | non-enzymatic |

Table S2. Demographics characteristics of participants

|  | HC | MDD | statistics | p |
| --- | --- | --- | --- | --- |
| sex (Male/Female) | 44/90 | 42/112 | 0.81* | 0.37 |
| age | 25.48(7.33) | 25.16(8.44) | -0.34# | 0.74 |
| BMI | 20.89(2.9) | 20.6(3.54) | -0.76# | 0.45 |
| onset age | - | 21.31(8) | - | - |
| number of episodes | - | 1.67(1.45) | - | - |
| current disease duration | - | 9.61(14.55) | - | - |
| Total score of HAMD | - | 21.65(4.67) | - | - |
| Total score of HAMA | - | 21.75(7.18) | - | - |

Note: The data are presented as mean (standard deviation)

# t statistics; * chi-square statistics.

Table S3. Demographics characteristics of participants with follow-up data

|  | non-  responder | responder | statistics | p |
| --- | --- | --- | --- | --- |
| sex (Male/Female) | 11/28 | 8/27 | 0.067* | 0.8 |
| age | 24.79(7.09) | 25.89(8.4) | 0.61# | 0.55 |
| BMI | 20.8(3.97) | 21.11(3.91) | 0.35# | 0.73 |
| onset age | 20.36(7.14) | 22.71(8.02) | 1.34# | 0.19 |
| number of episodes | 1.53(1.25) | 1.94(2.17) | 1.02# | 0.31 |
| current disease duration | 15.39(20.6) | 9.19(13.73) | -1.5# | 0.14 |
| Total score of HAMD (W0) | 20.97(4.72) | 20.97(5.02) | -0.0026# | 1 |
| Total score of HAMA (W0) | 21.03(7.8) | 21.63(6.94) | 0.35# | 0.73 |
| Total score of HAMD (W8) | 17.23(6.2) | 5.34(4.09) | -9.6# | ***1.5e-14*** |
| Total score of HAMA (W8) | 18.72(7.41) | 6.76(5.58) | -7.7# | ***6.3e-11*** |

Note: The data are presented as mean (standard deviation)

# t statistics; * chi-square statistics.

Table S4. Correlation between total scores/subscales of HAMD/HAMA and oxylipins

|  | **HAMD** | | | | | | **HAMA** | | |
| --- | --- | --- | --- | --- | --- | --- | --- | --- | --- |
| **total score** | **somatization** | **weight** | **cognitive disturbance** | **retardationdisturbance** | **sleep** | **total score** | **Somatic anxiety** | **psychological anxiety** |
| 9-HOTrE | 0.17  (0.34) | 0.043  (0.9) | -0.15  (0.58) | 0.12  (0.48) | 0.17  (0.38) | 0.17  (0.72) | -0.063  (0.94) | -0.083  (0.66) | -0.037  (0.98) |
| 13-HOTrE | 0.068  (0.74) | -0.16  (0.9) | -0.052  (0.76) | -0.03  (0.89) | 0.1  (0.52) | 0.2  (0.72) | -0.17  (0.92) | -0.22  (0.63) | -0.09  (0.95) |
| 12-HETE | -0.059  (0.75) | -0.045  (0.9) | -0.01  (0.93) | -0.17  (0.29) | -0.0022  (0.98) | -0.012  (0.95) | -0.031  (0.94) | 0.087  (0.66) | -0.15  (0.95) |
| 5-HETE | 0.056  (0.75) | 0.0017  (1) | -0.13  (0.6) | 0.17  (0.28) | 0.083  (0.54) | 0.017  (0.95) | -0.033  (0.94) | 0.035  (0.85) | -0.091  (0.95) |
| 15-HETE | -0.031  (0.86) | -0.049  (0.9) | -0.027  (0.9) | -0.055  (0.77) | 0.023  (0.9) | -0.019  (0.95) | -0.085  (0.94) | 0.036  (0.85) | -0.19  (0.95) |
| 15-HETrE | 0.1  (0.59) | 0.026  (0.9) | -0.049  (0.76) | 0.11  (0.51) | 0.088  (0.54) | 0.06  (0.8) | -0.0065  (0.97) | 0.099  (0.66) | -0.12  (0.95) |
| 14s-HDoHE | 0.16  (0.34) | 0.088  (0.9) | -0.087  (0.7) | 0.084  (0.62) | 0.16  (0.38) | 0.12  (0.76) | 0.14  (0.94) | 0.21  (0.66) | 0.014  (0.98) |
| 4-HDHA | 0.094  (0.61) | 0.054  (0.9) | -0.17  (0.58) | 0.23  (0.16) | 0.12  (0.42) | -0.0064  (0.95) | 0.025  (0.94) | 0.085  (0.66) | -0.051  (0.98) |
| 12-HEPE | -0.022  (0.92) | -0.13  (0.9) | 0.076  (0.76) | -0.072  (0.77) | 0.0042  (0.98) | -0.045  (0.95) | -0.2  (0.94) | -0.066  (0.83) | -0.27  (0.95) |
| 9,12,13-TriHOME | 0.026  (0.87) | -0.064  (0.9) | -0.078  (0.7) | -0.014  (0.93) | 0.092  (0.54) | -0.0097  (0.95) | -0.061  (0.94) | -0.12  (0.66) | 0.013  (0.98) |
| 13-oxo-ODE | 0.16  (0.42) | 0.035  (0.9) | -0.11  (0.7) | 0.1  (0.62) | 0.17  (0.38) | 0.17  (0.76) | -0.085  (0.94) | -0.13  (0.66) | -0.069  (0.98) |
| 5,6-diHETrE | 0.15  (0.34) | 0.044  (0.9) | -0.12  (0.62) | 0.28  (0.14) | 0.12  (0.42) | 0.0069  (0.95) | 0.038  (0.94) | 0.062  (0.74) | -0.00057  (1) |
| 14,15-DiHET | 0.2  (0.29) | 0.061  (0.9) | -0.11  (0.69) | 0.28  (0.14) | 0.23  (0.38) | 0.086  (0.76) | 0.0038  (0.97) | -0.02  (0.85) | 0.0089  (0.98) |
| 11,12-DiHET | 0.16  (0.34) | 0.055  (0.9) | -0.16  (0.58) | 0.2  (0.21) | 0.14  (0.38) | 0.11  (0.76) | 0.013  (0.94) | 0.096  (0.66) | -0.075  (0.95) |
| 19,20-DiHDPA | 0.21  (0.29) | 0.11  (0.9) | -0.11  (0.69) | 0.19  (0.21) | 0.16  (0.38) | 0.19  (0.72) | 0.15  (0.94) | 0.15  (0.66) | 0.087  (0.95) |
| 16,17-DiHDPA | 0.2  (0.29) | 0.12  (0.9) | -0.13  (0.6) | 0.19  (0.21) | 0.18  (0.38) | 0.17  (0.72) | 0.12  (0.94) | 0.12  (0.66) | 0.084  (0.95) |
| 13,14-DiHDPA | 0.23  (0.29) | 0.15  (0.9) | -0.18  (0.54) | 0.27  (0.14) | 0.16  (0.38) | 0.15  (0.76) | 0.12  (0.94) | 0.16  (0.66) | 0.031  (0.98) |
| 10,11-DiHDPA | 0.2  (0.29) | 0.08  (0.9) | -0.19  (0.54) | 0.26  (0.15) | 0.26  (0.29) | 0.14  (0.76) | 0.072  (0.94) | 0.035  (0.85) | 0.081  (0.95) |
| 22-HDHA | 0.19  (0.29) | 0.12  (0.9) | -0.2  (0.54) | 0.25  (0.15) | 0.23  (0.38) | 0.13  (0.76) | 0.1  (0.94) | 0.098  (0.66) | 0.063  (0.98) |
| 17,18-DiHETE | 0.21  (0.29) | 0.049  (0.9) | -0.018  (0.9) | 0.18  (0.21) | 0.18  (0.38) | 0.064  (0.8) | 0.092  (0.94) | 0.073  (0.69) | 0.072  (0.95) |
| 9,10-EpOME | 0.09  (0.61) | -0.1  (0.9) | -0.064  (0.76) | 0.091  (0.58) | 0.14  (0.38) | 0.14  (0.76) | -0.18  (0.92) | -0.18  (0.66) | -0.16  (0.95) |
| 12,13-diHOME | -0.04  (0.83) | -0.16  (0.9) | -0.092  (0.7) | 0.022  (0.93) | 0.084  (0.54) | 0.093  (0.76) | -0.21  (0.92) | -0.25  (0.63) | -0.11  (0.95) |
| 9,10-diHOME | -0.087  (0.61) | -0.24  (0.9) | -0.014  (0.92) | -0.076  (0.63) | -0.033  (0.89) | 0.17  (0.72) | -0.21  (0.92) | -0.21  (0.63) | -0.15  (0.95) |
| 11-HETE | 0.012  (0.93) | -0.033  (0.9) | -0.054  (0.76) | 0.03  (0.89) | 0.065  (0.65) | 0.014  (0.95) | -0.033  (0.94) | 0.064  (0.74) | -0.14  (0.95) |
| PGD3 | -0.19  (0.29) | -0.083  (0.9) | 0.019  (0.9) | -0.19  (0.21) | -0.11  (0.48) | -0.078  (0.78) | -0.18  (0.92) | -0.17  (0.66) | -0.1  (0.95) |
| PGE3 | -0.21  (0.29) | -0.11  (0.9) | 0.056  (0.76) | -0.2  (0.21) | -0.16  (0.38) | -0.073  (0.8) | -0.14  (0.94) | -0.17  (0.66) | -0.0061  (0.98) |
| 9-HODE | 0.16  (0.34) | 0.04  (0.9) | -0.2  (0.54) | 0.11  (0.51) | 0.27  (0.29) | 0.068  (0.8) | -0.082  (0.94) | -0.083  (0.66) | -0.075  (0.95) |
| 13-HODE | 0.12  (0.46) | 0.054  (0.9) | -0.084  (0.7) | 0.1  (0.51) | 0.14  (0.38) | 0.091  (0.76) | -0.099  (0.94) | -0.084  (0.66) | -0.13  (0.95) |
| 9-oxo-ODE | 0.24  (0.29) | 0.032  (0.9) | -0.15  (0.6) | 0.095  (0.62) | 0.15  (0.42) | 0.2  (0.72) | -0.049  (0.94) | -0.031  (0.85) | -0.041  (0.98) |
| ALA | 0.15  (0.34) | 0.041  (0.9) | -0.071  (0.72) | 0.21  (0.21) | 0.15  (0.38) | 0.081  (0.76) | -0.03  (0.94) | 0.025  (0.85) | -0.094  (0.95) |
| ARA | 0.041  (0.83) | -0.00026  (1) | -0.18  (0.54) | 0.15  (0.34) | 0.14  (0.38) | -0.058  (0.8) | -0.13  (0.94) | -0.095  (0.66) | -0.14  (0.95) |
| Adrenic acid | -0.13  (0.44) | -0.092  (0.9) | -0.15  (0.58) | 0.016  (0.93) | 0.085  (0.54) | -0.034  (0.95) | -0.084  (0.94) | -0.087  (0.66) | -0.092  (0.95) |
| DGLA | 0.15  (0.34) | 0.058  (0.9) | -0.18  (0.54) | 0.19  (0.21) | 0.14  (0.38) | 0.13  (0.76) | 0.018  (0.94) | 0.074  (0.69) | -0.047  (0.98) |
| DHA | 0.086  (0.61) | 0.094  (0.9) | -0.14  (0.58) | 0.14  (0.4) | 0.11  (0.47) | 0.12  (0.76) | 0.031  (0.94) | 0.04  (0.85) | 0.012  (0.98) |
| EPA | 0.15  (0.34) | 0.034  (0.9) | -0.084  (0.7) | 0.24  (0.15) | 0.097  (0.52) | 0.016  (0.95) | 0.051  (0.94) | 0.13  (0.66) | -0.029  (0.98) |
| GLA | 0.19  (0.29) | 0.071  (0.9) | -0.078  (0.7) | 0.24  (0.15) | 0.18  (0.38) | 0.081  (0.76) | -0.022  (0.94) | 0.03  (0.85) | -0.082  (0.95) |
| LA | 0.16  (0.34) | 0.089  (0.9) | -0.1  (0.7) | 0.22  (0.16) | 0.17  (0.38) | 0.096  (0.76) | -0.014  (0.94) | -0.02  (0.85) | -0.024  (0.98) |
| CUDA | 0.0019  (0.99) | -0.0028  (1) | 0.056  (0.76) | 0.037  (0.88) | 0.02  (0.9) | 0.12  (0.76) | -0.045  (0.94) | -0.14  (0.66) | 0.05  (0.98) |
| 16-HDHA | 0.1  (0.59) | 0.001  (1) | -0.14  (0.58) | 0.1  (0.51) | 0.2  (0.38) | 0.086  (0.76) | 0.058  (0.94) | 0.12  (0.66) | -0.036  (0.98) |
| 10-HDHA | 0.063  (0.75) | 0.066  (0.9) | -0.053  (0.76) | 0.014  (0.93) | -0.026  (0.9) | 0.2  (0.72) | 0.066  (0.94) | 0.11  (0.66) | -0.013  (0.98) |
| 11-HDHA | 0.065  (0.75) | 0.061  (0.9) | -0.11  (0.69) | -0.0052  (0.96) | 0.17  (0.38) | 0.086  (0.76) | 0.04  (0.94) | 0.086  (0.66) | -0.029  (0.98) |
| 8-HDHA | -0.038  (0.86) | -0.13  (0.9) | -0.3  (0.54) | 0.14  (0.49) | 0.023  (0.9) | -0.039  (0.95) | 0.047  (0.94) | 0.12  (0.66) | -0.043  (0.98) |

Note: The data are presented as “r value (p value)”

Figure S1. Comparison of total HAMD/HAMA scores between responders and non-responders


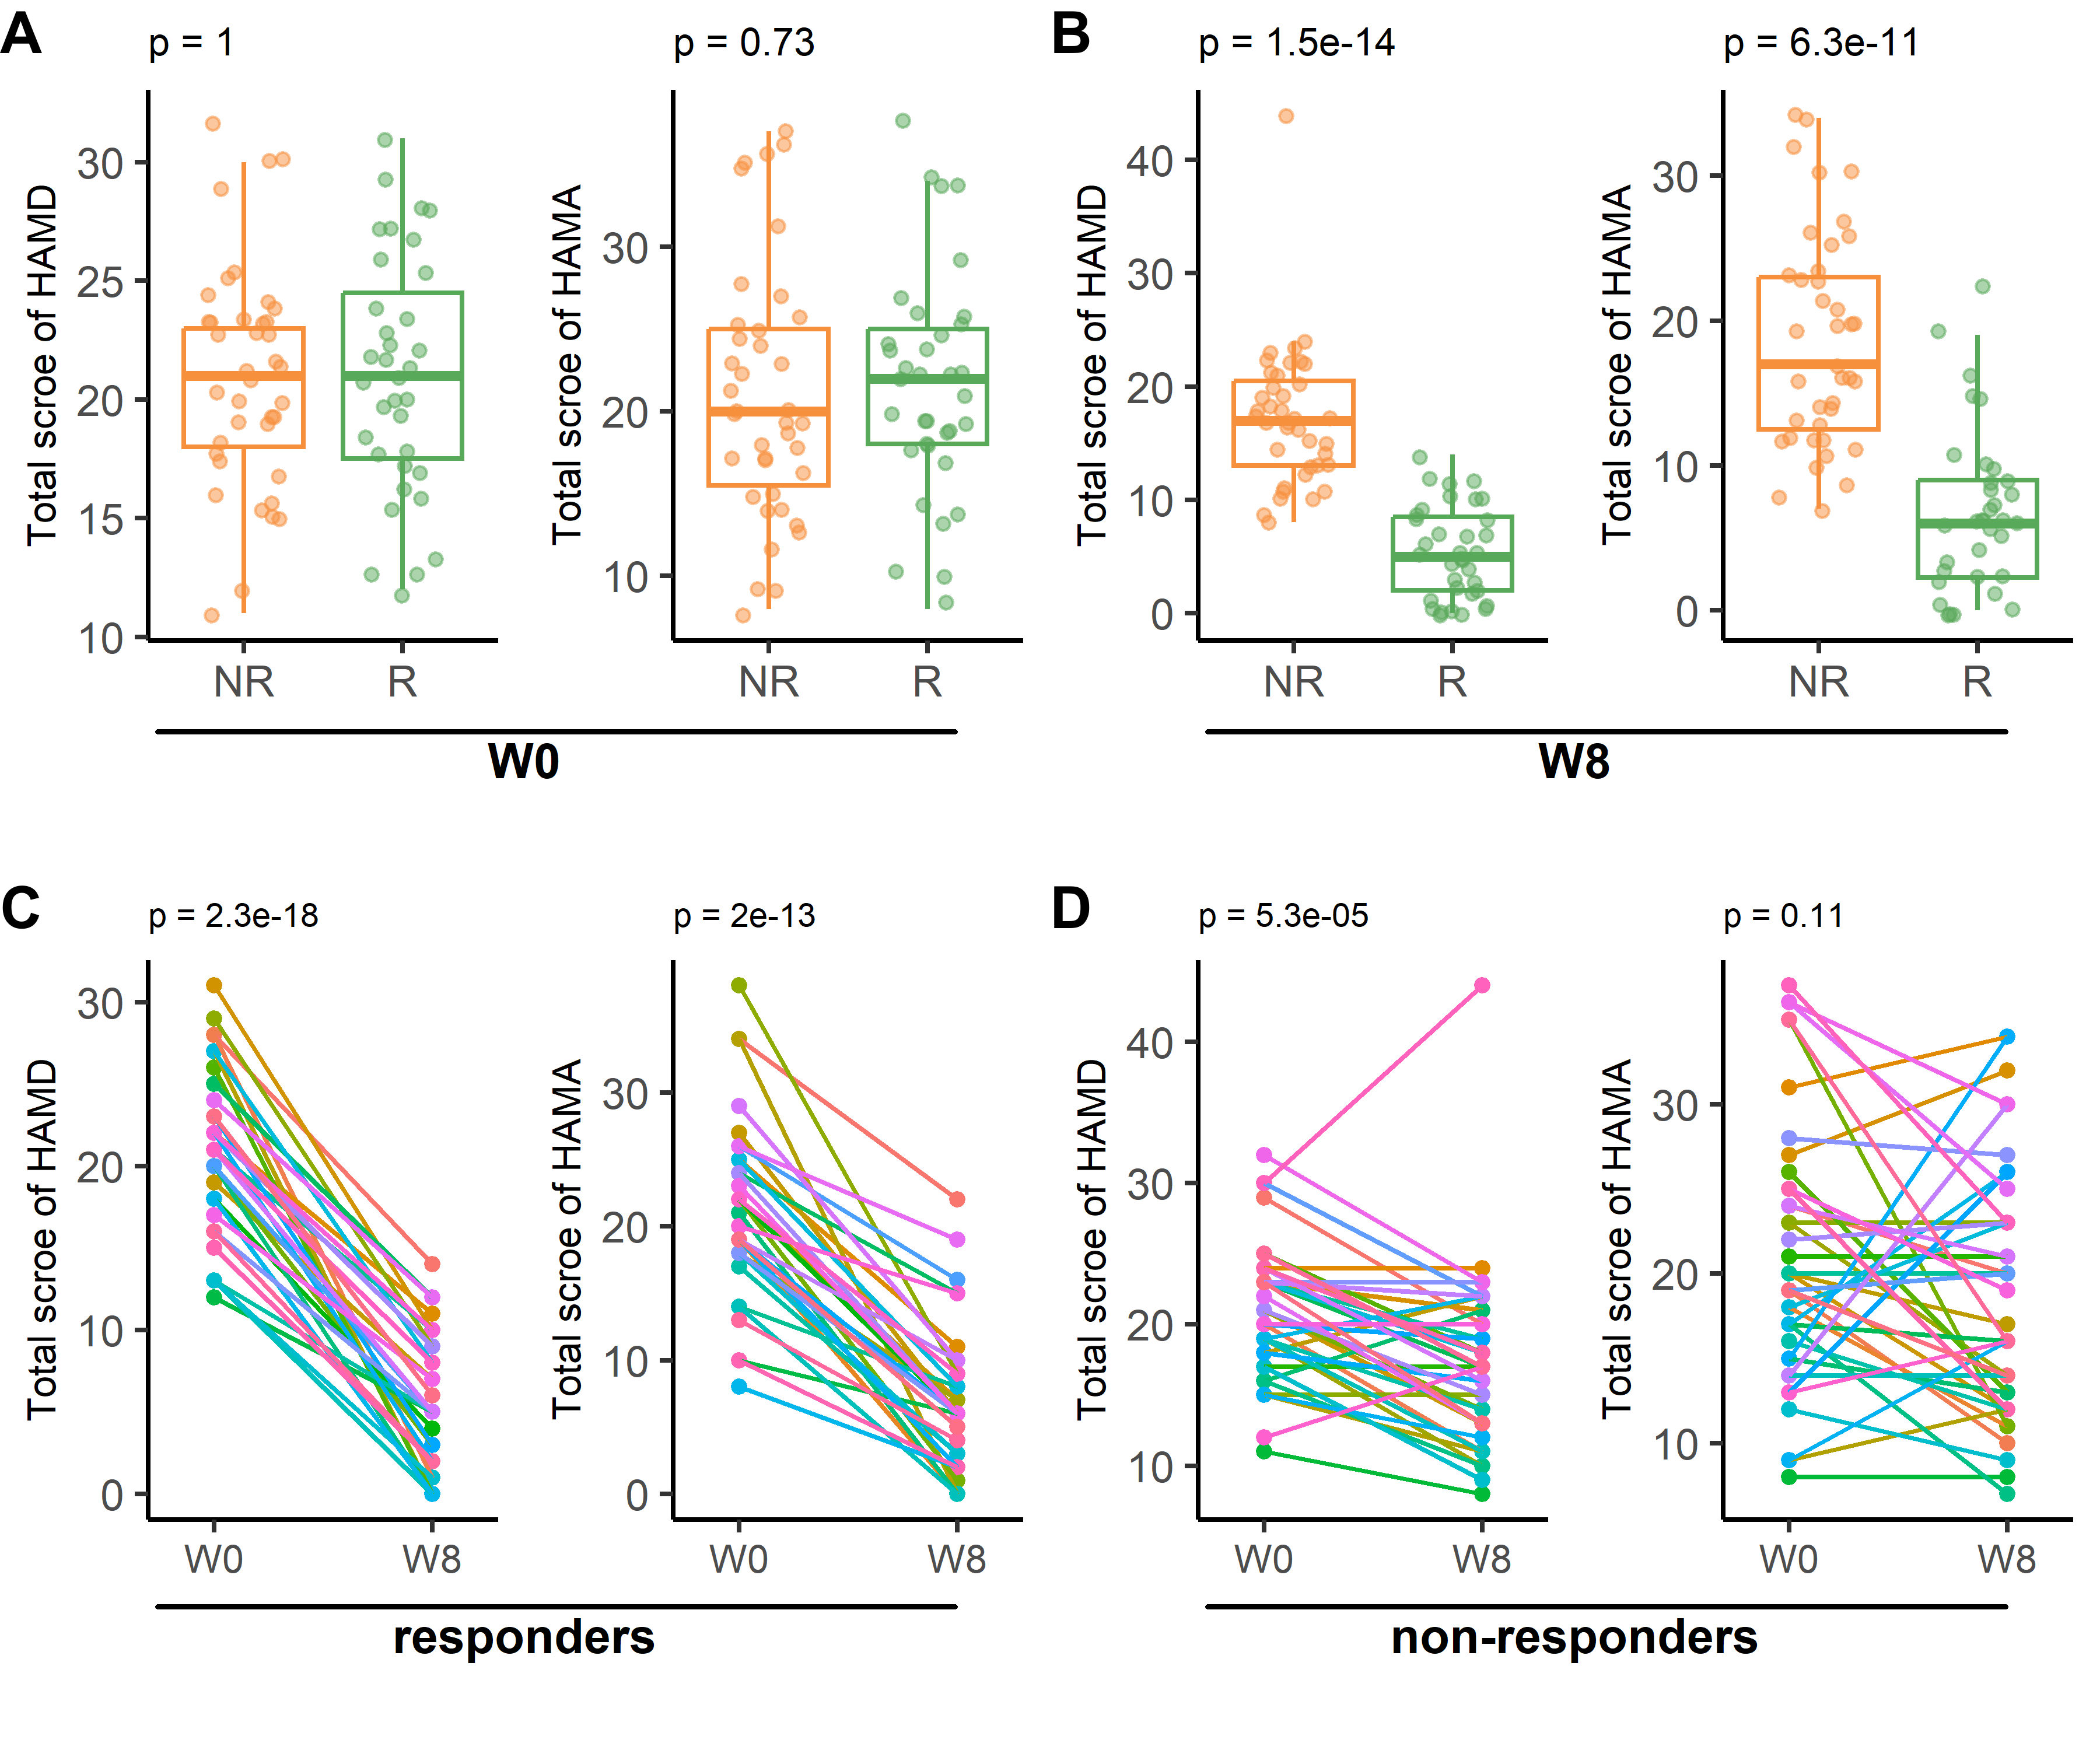


Figure S2. Correlation between plasma oxylipin levels and reduction rate of HAMA


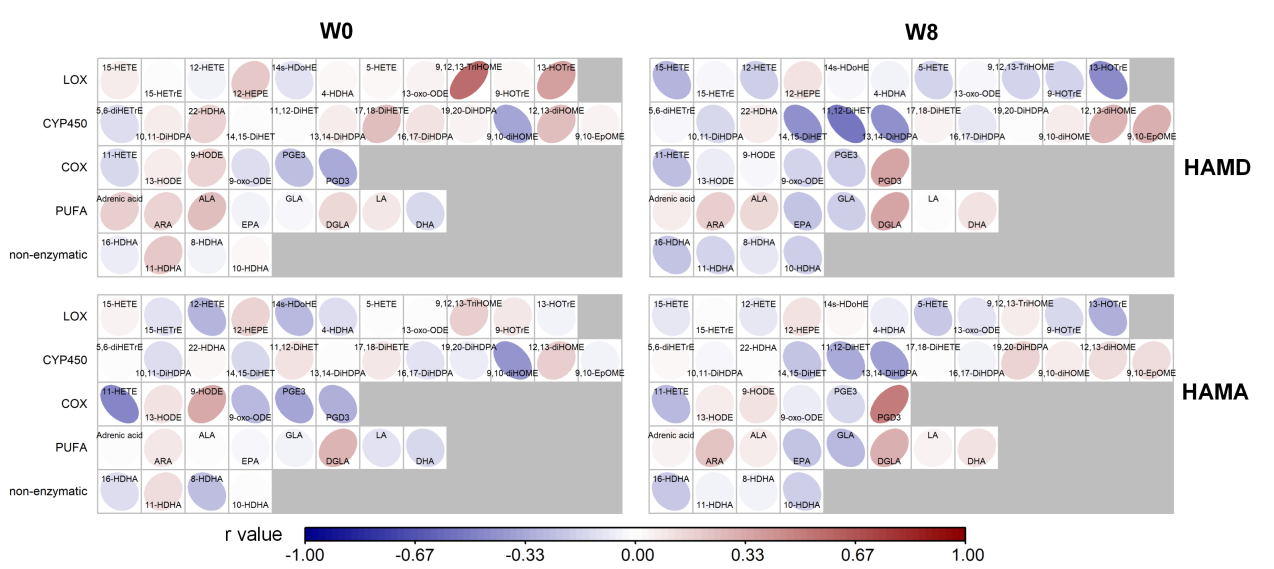


**
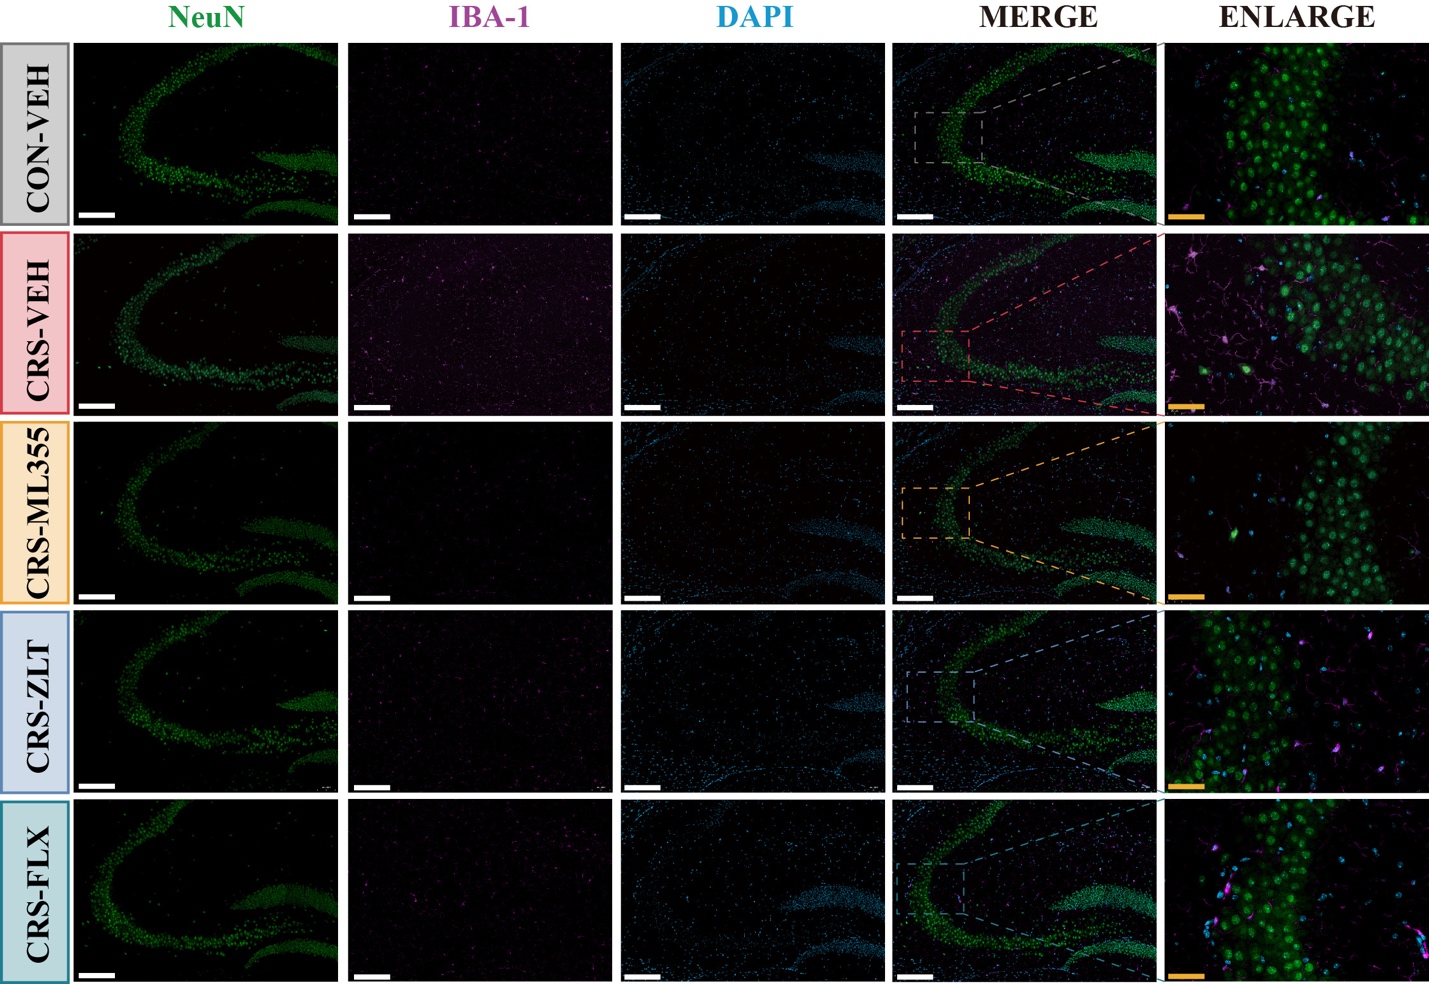
**

Figure S3 Representative images of microglial activation (Iba-1) in the hippocampal CA3 region across treatment groups. White scale bar=200 μm, yellow scale bar=50 μm.


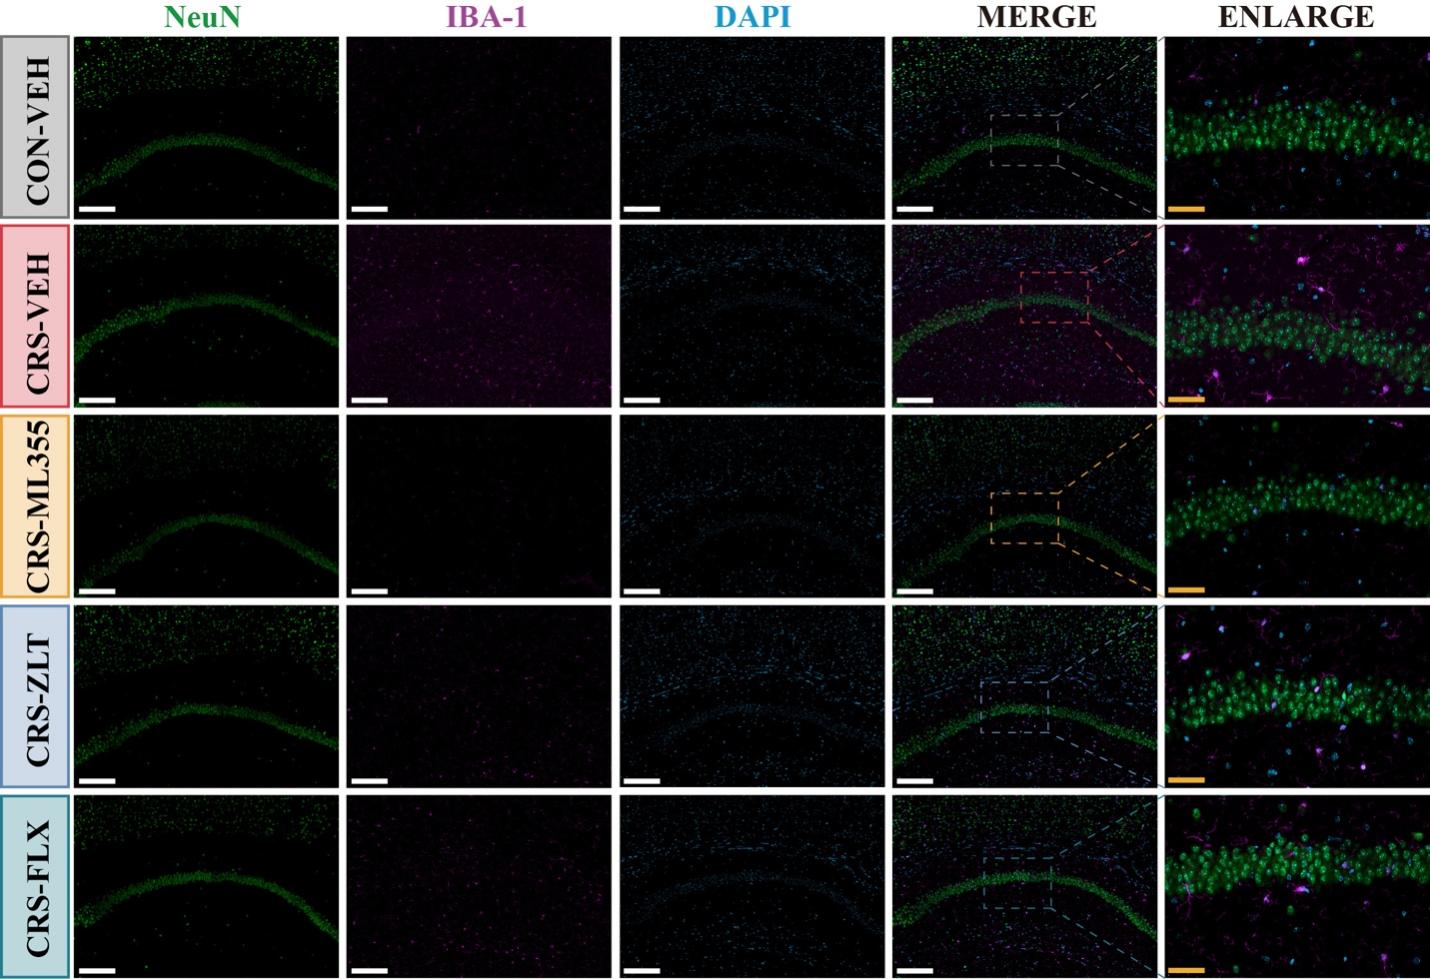


Figure S4 Representative images of microglial activation (Iba-1) in the hippocampal CA1 region across treatment groups. White scale bar=200 μm, yellow scale bar=50 μm.


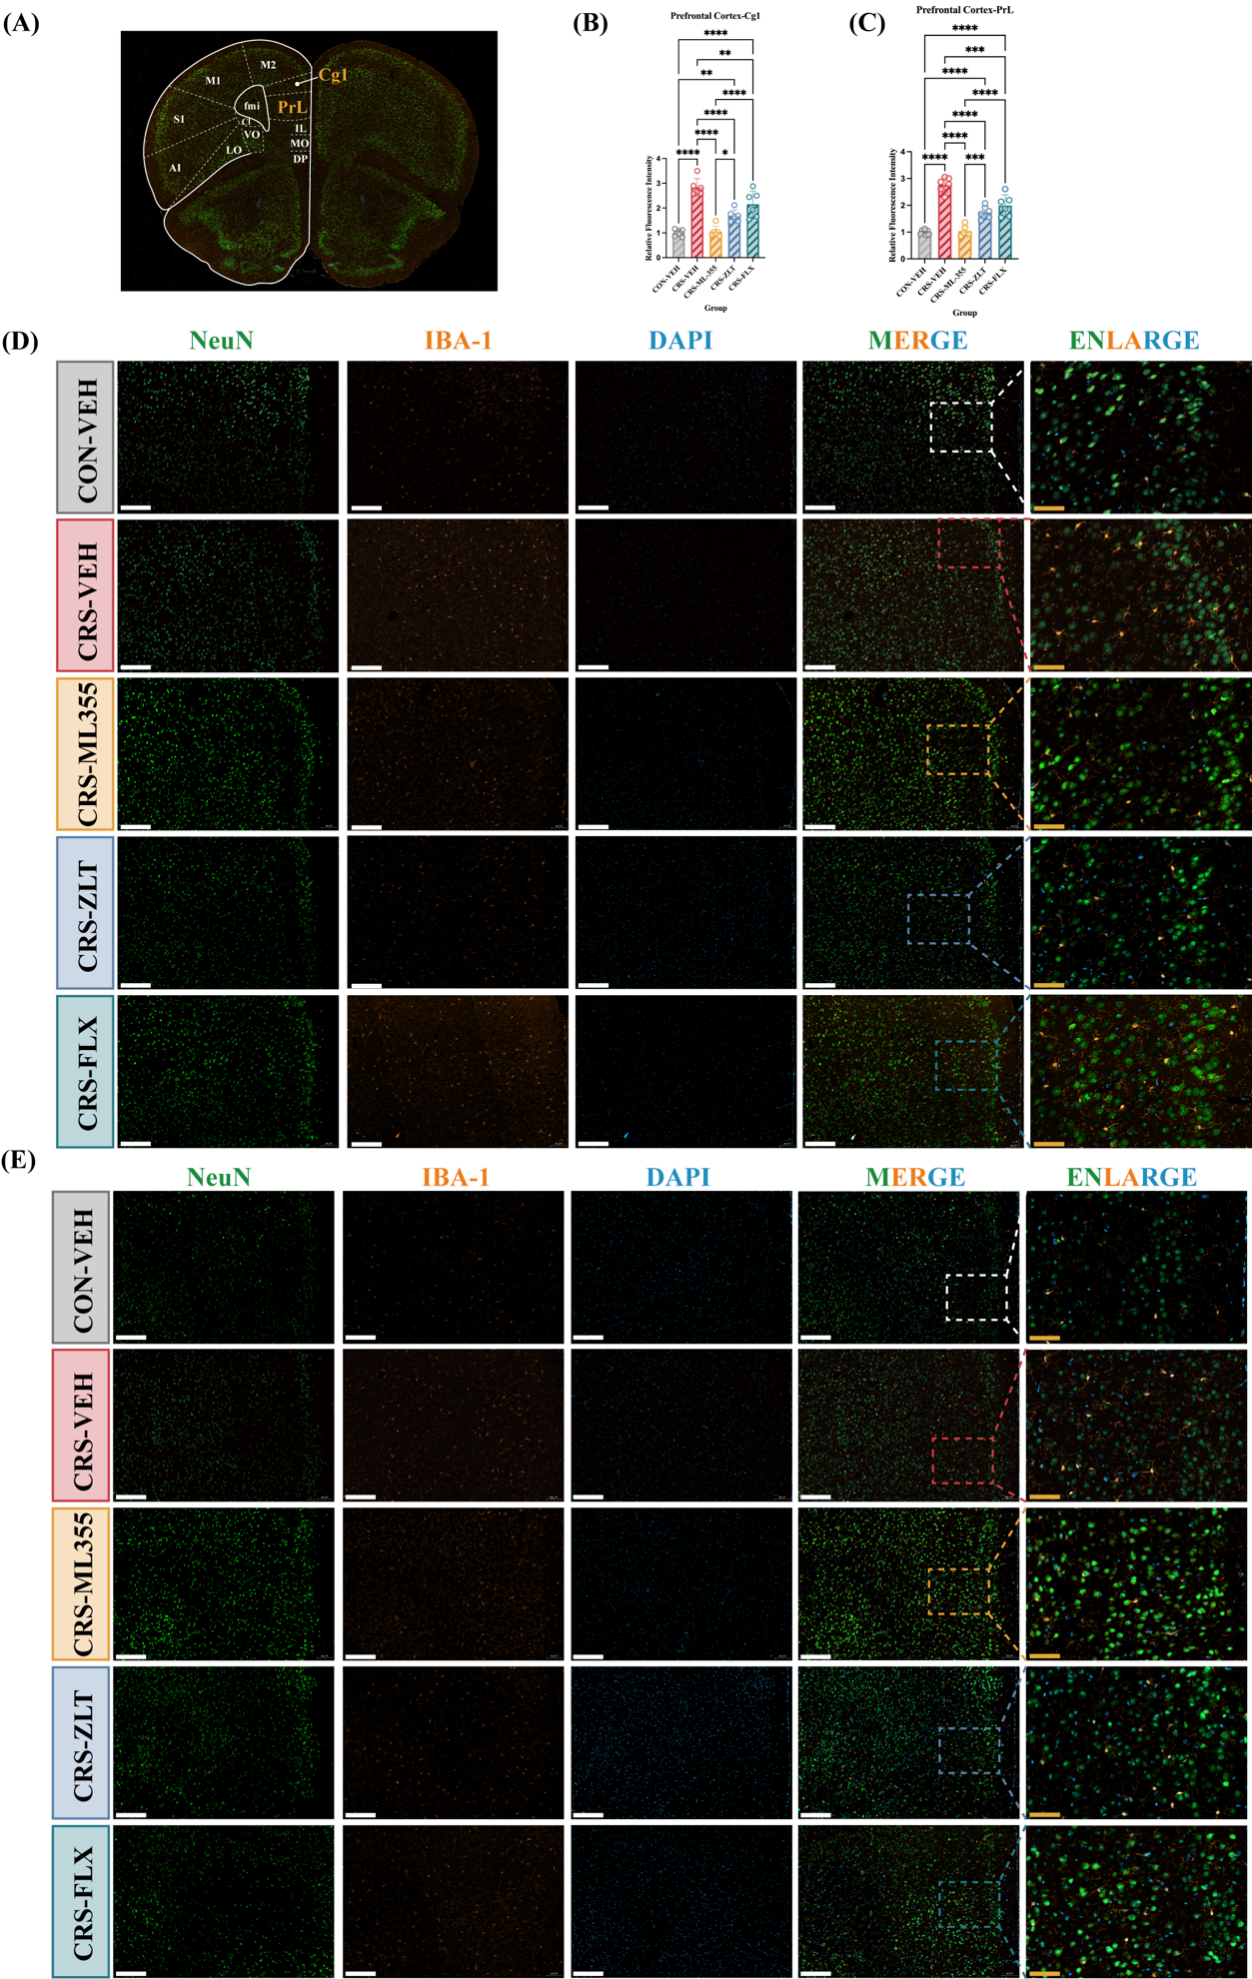


FigureS5 ML-355 inhibits chronic restraint stress-induced microglial activation (Iba-1) in the prefrontal cortex (PFC).

(A) Schematic diagram of coronal section of the hippocampus with regional segmentation.(B-C) Quantitative analysis of relative fluorescence intensity of Iba-1 (microglial activation) in the Cg1 region and PrL region of PFC among different groups. (D) Representative images of microglial activation (Iba-1) in the Cg1 region of PFC among different groups. (E) Representative images of microglial activation (Iba-1) in the PrL region of PFC among different groups. White scale bar=200 μm, yellow scale bar=75 μm. N=6~8 per group in (B)~(C). Statistical significance: *p<0.05, **p<0.01, ***p<0.001,****p<0.0001. The data are expressed as the means ± SD. Cg1: cingulate cortex, area 1, PrL: prelimbic cortex, M2: secondary motor cortex, M1: primary motor cortex, S1: primary somatosensory cortex, AI: agranular insular cortex, LO: lateral orbital cortex, VO: ventral orbital cortex, MO: medial orbital cortex, fmi: forceps minor of the corpus callosum, cl: claustrum.
